# Supplementary material for: Effect of In Vitro Gastrointestinal Digestion on Amino Acids, Polyphenols and Antioxidant Capacity of Tamarillo Yoghurts
Source: MDPI journal article supplement (doi:10.3390/ijms23052526), 2022-02-25
Supplement: s1 [file s1]

Table S1. Estimated contributions of Laird's Large tamarillo and milk to nutrient and phytochemical content of fortified yoghurt

| <b>Nutrients</b>                                       | Tamarillo pulp<br>(g%) | Tamarillo powder<br>(g%) | Milk<br>(g%) | 5% yoghurt<br>(g%) | 10% yoghurt<br>(g%) | 15% yoghurt<br>(g%) |
|--------------------------------------------------------|------------------------|--------------------------|--------------|--------------------|---------------------|---------------------|
| Water                                                  | 88.1                   | 3                        | 87.6         | 83.4               | 79.1                | 74.9                |
| Protein                                                | 1.2                    | 10.08                    | 3.3          | 3.64               | 3.98                | 4.32                |
| Lipid                                                  | 0.29                   | 2.44                     | 3.1          | 3.07               | 3.03                | 3.00                |
| Fibre                                                  | 3                      | 25.21                    | 0            | 1.26               | 2.52                | 3.78                |
| Carbohydrate                                           | 3.8                    | 31.93                    | 4.5          | 5.87               | 7.24                | 8.61                |
| <b>Phytochemicals</b>                                  |                        | (mg%)                    | (mg%)        | (mg%)              | (mg%)               | (mg%)               |
| $\gamma$ -Amino butyric acid (GABA)                    | n.a                    | 433                      | n.a          | 21.7               | 43.3                | 65.0                |
| <u>Total Phenolics</u>                                 | n.a                    | 122.26                   | n.a          | 6.1                | 12.2                | 18.3                |
| Rutin                                                  | n.a                    | 0.97                     | n.a          | 0.05               | 0.10                | 0.15                |
| Kaempferol-3-rutinoside                                | n.a                    | 50.04                    | n.a          | 2.5                | 5.0                 | 7.5                 |
| Chlorogenic acid                                       | n.a                    | 66.35                    | n.a          | 3.3                | 6.6                 | 10.0                |
| <u>Total anthocyanins</u>                              | n.a                    | 481.37                   | n.a          | 24.1               | 48.1                | 72.2                |
| Delphinidin-3-rutinoside                               | n.a                    | 254.76                   | n.a          | 12.7               | 25.5                | 38.2                |
| Pelargonidin-3-rutinoside                              | n.a                    | 200.66                   | n.a          | 10.0               | 20.1                | 30.1                |
| <u>Total phenolic content and antioxidant activity</u> |                        |                          |              |                    |                     |                     |
| TPC (mg GAE%)                                          | n.a                    | 707.04                   | n.a          | 35.4               | 70.7                | 106.1               |
| CUPRAC (mg TEAC%)                                      | n.a                    | 1312.02                  | n.a          | 65.6               | 131.2               | 196.8               |
| FRAP (mg TEAC%)                                        | n.a                    | 1004.33                  | n.a          | 75.3               | 150.7               | 225.9               |

Contributions of tamarillo compositions were calculated from our previous papers [3,4]. Contributions of milk compositions were calculated from reference [50]. Total Phenolics was calculated from all phenolics determined by LC-MS/MS. TPC was identified by the Folin-Ciocalteu assay. TPC: total phenolic content; CUPRAC: cupric ion-reducing antioxidant capacity; FRAP: ferric reducing ability of plasma; GAE: gallic acid equivalent; TEAC: trolox equivalent antioxidant capacity; n.a: not applicable

Table S2A. Concentrations (mg/100g yoghurt) of free amino acids in control and tamarillo fortified yoghurts, undigested.

| Free amino acids  | Control                        | POS5                           | POS10                          | POS15                          | PRE5                           | PRE10                         | PRE15                         |
|-------------------|--------------------------------|--------------------------------|--------------------------------|--------------------------------|--------------------------------|-------------------------------|-------------------------------|
| L-Histidine       | 0.21 ± 0.11 <sup>a</sup>       | 5.9 ± 0.14 <sup>b</sup>        | 10.75 ± 0.37 <sup>c</sup>      | 18.1 ± 1.18 <sup>a</sup>       | 5.36 ± 0.15 <sup>b</sup>       | 10.75 ± 0.63 <sup>c</sup>     | 13.9 ± 1.82 <sup>e</sup>      |
| L-Threonine       | 0.13 ± 0.03 <sup>a</sup>       | 0.67 ± 0.06 <sup>b</sup>       | 0.89 ± 0.01 <sup>c</sup>       | 1.90 ± 0.03 <sup>d</sup>       | 3.53 ± 0.14 <sup>e</sup>       | 5.21 ± 0.16 <sup>f</sup>      | 5.50 ± 0.35 <sup>f</sup>      |
| L-Lysine          | 0.28 ± 0.01 <sup>a</sup>       | 2.50 ± 0.10 <sup>b</sup>       | 4.18 ± 0.02 <sup>c</sup>       | 7.26 ± 0.24 <sup>d</sup>       | 6.92 ± 0.23 <sup>d</sup>       | 10.6 ± 0.71 <sup>e</sup>      | 10.9 ± 0.90 <sup>e</sup>      |
| L-Valine          | 0.10 ± 0.02 <sup>a</sup>       | 0.57 ± 0.04 <sup>b</sup>       | 0.85 ± 0.04 <sup>c</sup>       | 1.36 ± 0.04 <sup>d</sup>       | 10.2 ± 0.34 <sup>e</sup>       | 12.3 ± 0.55 <sup>f</sup>      | 11.3 ± 0.82 <sup>ef</sup>     |
| L-Methionine      | 0.09 ± 0.00 <sup>a</sup>       | 0.14 ± 0.00 <sup>b</sup>       | 0.20 ± 0.01 <sup>c</sup>       | 0.33 ± 0.05 <sup>d</sup>       | 1.42 ± 0.12 <sup>e</sup>       | 2.00 ± 0.28 <sup>f</sup>      | 2.56 ± 0.52 <sup>f</sup>      |
| L-Leucine         | 0.06 ± 0.01 <sup>a</sup>       | 0.48 ± 0.03 <sup>b</sup>       | 0.62 ± 0.03 <sup>c</sup>       | 1.47 ± 0.05 <sup>d</sup>       | 7.31 ± 0.21 <sup>e</sup>       | 8.99 ± 0.69 <sup>f</sup>      | 9.50 ± 0.41 <sup>g</sup>      |
| L-Isoleucine      | 0.18 ± 0.02 <sup>a</sup>       | 0.86 ± 0.04 <sup>b</sup>       | 1.13 ± 0.05 <sup>c</sup>       | 2.25 ± 0.05 <sup>d</sup>       | 24.3 ± 0.74 <sup>e</sup>       | 30.7 ± 2.37 <sup>f</sup>      | 33.0 ± 1.25 <sup>f</sup>      |
| L-Phenylalanine   | 0.36 ± 0.07 <sup>a</sup>       | 0.73 ± 0.04 <sup>b</sup>       | 0.83 ± 0.03 <sup>c</sup>       | 1.42 ± 0.07 <sup>d</sup>       | 13.3 ± 0.35 <sup>e</sup>       | 18.0 ± 2.13 <sup>f</sup>      | 18.4 ± 0.92 <sup>f</sup>      |
| L-Tryptophan      | 0.15 ± 0.03 <sup>a</sup>       | 0.39 ± 0.03 <sup>b</sup>       | 0.51 ± 0.02 <sup>c</sup>       | 1.15 ± 0.06 <sup>d</sup>       | 5.00 ± 0.14 <sup>e</sup>       | 6.85 ± 0.80 <sup>f</sup>      | 7.15 ± 0.40 <sup>g</sup>      |
| <i>TEFAAs</i>     | <i>1.56 ± 0.31<sup>a</sup></i> | <i>12.3 ± 0.48<sup>b</sup></i> | <i>20.0 ± 0.58<sup>c</sup></i> | <i>35.2 ± 1.76<sup>d</sup></i> | <i>77.4 ± 2.43<sup>e</sup></i> | <i>105 ± 5.75<sup>f</sup></i> | <i>112 ± 9.96<sup>g</sup></i> |
| Hydroxy-L-Proline | 0.02 ± 0.00 <sup>a</sup>       | 0.14 ± 0.01 <sup>b</sup>       | 0.22 ± 0.00 <sup>c</sup>       | 0.21 ± 0.01 <sup>c</sup>       | 0.15 ± 0.01 <sup>b</sup>       | 0.25 ± 0.01 <sup>d</sup>      | 0.33 ± 0.05 <sup>e</sup>      |
| L-Carnosine       | 0.06 ± 0.03 <sup>a</sup>       | 0.06 ± 0.02 <sup>a</sup>       | 0.07 ± 0.02 <sup>a</sup>       | 0.29 ± 0.14 <sup>b</sup>       | 0.11 ± 0.02 <sup>c</sup>       | 0.11 ± 0.01 <sup>c</sup>      | 0.20 ± 0.11 <sup>b</sup>      |
| L-Arginine        | 0.41 ± 0.05 <sup>a</sup>       | 1.74 ± 0.02 <sup>b</sup>       | 2.71 ± 0.12 <sup>c</sup>       | 4.09 ± 0.26 <sup>d</sup>       | 6.09 ± 0.10 <sup>e</sup>       | 7.23 ± 0.53 <sup>f</sup>      | 7.48 ± 0.67 <sup>f</sup>      |
| Ethanolamine      | 0.41 ± 0.05 <sup>a</sup>       | 1.64 ± 0.10 <sup>b</sup>       | 1.74 ± 0.06 <sup>b</sup>       | 3.31 ± 0.08 <sup>c</sup>       | 2.29 ± 0.08 <sup>d</sup>       | 2.78 ± 0.09 <sup>e</sup>      | 2.81 ± 0.20 <sup>e</sup>      |
| L-Serine          | 0.10 ± 0.07 <sup>a</sup>       | 1.50 ± 0.10 <sup>b</sup>       | 2.98 ± 0.07 <sup>c</sup>       | 4.13 ± 0.11 <sup>d</sup>       | 3.88 ± 0.11 <sup>e</sup>       | 7.17 ± 0.27 <sup>f</sup>      | 7.49 ± 0.44 <sup>f</sup>      |
| Glycine           | 0.04 ± 0.04 <sup>a</sup>       | 0.14 ± 0.02 <sup>b</sup>       | 0.18 ± 0.00 <sup>c</sup>       | 0.55 ± 0.05 <sup>d</sup>       | 1.80 ± 0.05 <sup>e</sup>       | 3.16 ± 0.11 <sup>f</sup>      | 3.26 ± 0.34 <sup>f</sup>      |
| Sarcosine         | 0.01 ± 0.00 <sup>a</sup>       | 0.01 ± 0.00 <sup>a</sup>       | 0.01 ± 0.00 <sup>ab</sup>      | 0.01 ± 0.00 <sup>b</sup>       | 0.01 ± 0.00 <sup>a</sup>       | 0.01 ± 0.00 <sup>ab</sup>     | 0.01 ± 0.00 <sup>b</sup>      |
| L-Aspartic acid   | 0.16 ± 0.01 <sup>a</sup>       | 20.1 ± 1.51 <sup>b</sup>       | 37.3 ± 0.41 <sup>c</sup>       | 50.0 ± 2.37 <sup>d</sup>       | 19.5 ± 0.43 <sup>b</sup>       | 37.9 ± 1.49 <sup>c</sup>      | 47.97 ± 1.92 <sup>e</sup>     |
| Taurine           | 0.36 ± 0.06 <sup>a</sup>       | 0.28 ± 0.02 <sup>b</sup>       | 0.26 ± 0.00 <sup>c</sup>       | 0.26 ± 0.02 <sup>bc</sup>      | 0.24 ± 0.01 <sup>e</sup>       | 0.22 ± 0.01 <sup>ef</sup>     | 0.21 ± 0.04 <sup>f</sup>      |
| β-Alanine         | < 0.005 <sup>a</sup>           | 0.32 ± 0.03 <sup>b</sup>       | 0.58 ± 0.00 <sup>c</sup>       | 0.61 ± 0.03 <sup>c</sup>       | 0.30 ± 0.02 <sup>b</sup>       | 0.57 ± 0.03 <sup>c</sup>      | 0.79 ± 0.04 <sup>d</sup>      |
| L-Glutamic acid   | 0.81 ± 0.04 <sup>a</sup>       | 171 ± 13.5 <sup>b</sup>        | 285 ± 2.65 <sup>c</sup>        | 409 ± 37.6 <sup>d</sup>        | 160 ± 5.49 <sup>e</sup>        | 280 ± 7.88 <sup>c</sup>       | 358 ± 20.6 <sup>f</sup>       |

|                         |                          |                          |                          |                          |                          |                          |                          |
|-------------------------|--------------------------|--------------------------|--------------------------|--------------------------|--------------------------|--------------------------|--------------------------|
| L-Citrulline            | 0.13 ± 0.05 <sup>a</sup> | 0.17 ± 0.01 <sup>b</sup> | 0.22 ± 0.01 <sup>c</sup> | 0.28 ± 0.03 <sup>d</sup> | 0.19 ± 0.01 <sup>b</sup> | 0.23 ± 0.01 <sup>c</sup> | 0.26 ± 0.01 <sup>d</sup> |
| L-Alanine               | 0.48 ± 0.04 <sup>a</sup> | 3.22 ± 0.20 <sup>b</sup> | 5.23 ± 0.08 <sup>c</sup> | 10.7 ± 0.08 <sup>d</sup> | 5.83 ± 0.15 <sup>e</sup> | 9.48 ± 0.41 <sup>f</sup> | 10.7 ± 0.48 <sup>d</sup> |
| γ-Aminobutyric acid     | 0.03 ± 0.00 <sup>a</sup> | 29.2 ± 2.05 <sup>b</sup> | 54.8 ± 0.39 <sup>c</sup> | 71.5 ± 2.82 <sup>d</sup> | 26.2 ± 0.80 <sup>b</sup> | 48.6 ± 2.52 <sup>e</sup> | 61.5 ± 2.96 <sup>f</sup> |
| L-Proline               | 1.64 ± 0.25 <sup>a</sup> | 7.1 ± 0.41 <sup>b</sup>  | 10.1 ± 0.37 <sup>c</sup> | 17.5 ± 0.67 <sup>d</sup> | 11.0 ± 0.38 <sup>e</sup> | 17.4 ± 0.74 <sup>d</sup> | 19.5 ± 2.01 <sup>f</sup> |
| β-Amino-isobutyric acid | 0.01 ± 0.00 <sup>a</sup> | 0.03 ± 0.01 <sup>b</sup> | 0.04 ± 0.00 <sup>c</sup> | 0.04 ± 0.01 <sup>c</sup> | 0.03 ± 0.00 <sup>b</sup> | 0.04 ± 0.00 <sup>c</sup> | 0.05 ± 0.00 <sup>d</sup> |
| α-Aminobutyric acid     | 0.01 ± 0.00 <sup>a</sup> | 0.02 ± 0.01 <sup>a</sup> | 0.06 ± 0.01 <sup>b</sup> | 0.07 ± 0.00 <sup>b</sup> | 0.04 ± 0.00 <sup>c</sup> | 0.05 ± 0.01 <sup>c</sup> | 0.07 ± 0.00 <sup>b</sup> |
| δ-Hydroxylysine         | n.d.                     |
| L-Ornithine             | 0.04 ± 0.00 <sup>a</sup> | 0.26 ± 0.02 <sup>b</sup> | 0.89 ± 0.02 <sup>c</sup> | 0.94 ± 0.02 <sup>d</sup> | 0.25 ± 0.01 <sup>b</sup> | 0.48 ± 0.04 <sup>c</sup> | 0.62 ± 0.03 <sup>f</sup> |
| Cystathionine           | 0.02 ± 0.00 <sup>a</sup> | 0.10 ± 0.02 <sup>b</sup> | 0.10 ± 0.06 <sup>b</sup> | 0.10 ± 0.02 <sup>b</sup> | 0.04 ± 0.03 <sup>c</sup> | 0.04 ± 0.00 <sup>c</sup> | 0.06 ± 0.00 <sup>d</sup> |
| L-Cystine               | n.d.                     | n.d.                     | < 0.005 <sup>a</sup>     | < 0.005 <sup>a</sup>     | n.d.                     | < 0.005 <sup>a</sup>     | 0.01 ± 0.00 <sup>b</sup> |
| L-Anserine              | 0.05 ± 0.00 <sup>a</sup> | 0.07 ± 0.00 <sup>b</sup> | 0.11 ± 0.02 <sup>c</sup> | 0.12 ± 0.03 <sup>c</sup> | 0.13 ± 0.02 <sup>d</sup> | 0.25 ± 0.11 <sup>e</sup> | 0.30 ± 0.16 <sup>f</sup> |
| L-Tyrosine              | 0.62 ± 0.12 <sup>a</sup> | 1.18 ± 0.09 <sup>b</sup> | 1.89 ± 0.08 <sup>c</sup> | 2.73 ± 0.12 <sup>d</sup> | 11.6 ± 0.29 <sup>e</sup> | 16.9 ± 0.92 <sup>f</sup> | 16.3 ± 2.02 <sup>f</sup> |
| L-Homocystine           | n.d.                     |
| <i>TNEFAAs</i>          | 5.42 ± 0.81 <sup>a</sup> | 238 ± 18.2 <sup>b</sup>  | 404 ± 4.37 <sup>c</sup>  | 576 ± 44.6 <sup>d</sup>  | 250 ± 8.01 <sup>e</sup>  | 433 ± 15.5 <sup>f</sup>  | 538 ± 31.9 <sup>d</sup>  |
| <i>TFAAs</i>            | 6.98 ± 1.11 <sup>a</sup> | 251 ± 18.7 <sup>b</sup>  | 424 ± 4.95 <sup>c</sup>  | 611 ± 46.4 <sup>d</sup>  | 327 ± 10.4 <sup>e</sup>  | 538 ± 21.2 <sup>f</sup>  | 650 ± 42 <sup>d</sup>    |

\* n.d: not detected. Data are expressed as Mean ± SD (n = 3). Different alphabets superscripts indicate statistical difference ( $p < 0.05$ ) across each row. POS5, POS10, and POS15: 5, 10, and 15% tamarillo powder was added post-fermentation, respectively. PRE5, PRE10, and PRE15: 5, 10, and 15% tamarillo powder was added to milk and starter culture prior to fermentation, respectively. TEFAAs: total essential free amino acids, TNEFAAs: total non-essential free amino acids, TFAAs: total free amino acids.

Table S2B. Concentrations (mg/100g yoghurt) of free amino acids in control and tamarillo fortified yoghurts after each step of *in vitro* digestion.

| Free amino acids/phases | After Oral phase         |                           |                           |                           |                           |                           |                           |
|-------------------------|--------------------------|---------------------------|---------------------------|---------------------------|---------------------------|---------------------------|---------------------------|
|                         | Control                  | POS5                      | POS10                     | POS15                     | PRE5                      | PRE10                     | PRE15                     |
| L-Histidine             | 4.41 ± 1.62 <sup>a</sup> | 7.72 ± 2.39 <sup>b</sup>  | 12.7 ± 1.11 <sup>c</sup>  | 15.7 ± 2.14 <sup>d</sup>  | 18.0 ± 3.54 <sup>e</sup>  | 17.3 ± 4.95 <sup>e</sup>  | 15.6 ± 2.48 <sup>d</sup>  |
| L-Threonine             | 6.58 ± 0.44 <sup>a</sup> | 4.21 ± 1.77 <sup>b</sup>  | 4.06 ± 0.93 <sup>b</sup>  | 4.96 ± 1.90 <sup>b</sup>  | 10.8 ± 5.18 <sup>c</sup>  | 7.68 ± 2.49 <sup>ac</sup> | 7.10 ± 0.96 <sup>a</sup>  |
| L-Lysine                | 20.3 ± 2.97 <sup>a</sup> | 22.0 ± 8.22 <sup>b</sup>  | 27.6 ± 6.15 <sup>c</sup>  | 27.8 ± 3.69 <sup>c</sup>  | 44.6 ± 17.0 <sup>d</sup>  | 34.6 ± 11.5 <sup>e</sup>  | 35.7 ± 2.65 <sup>e</sup>  |
| L-Valine                | 4.52 ± 0.34 <sup>a</sup> | 6.47 ± 1.98 <sup>b</sup>  | 8.05 ± 1.53 <sup>c</sup>  | 8.05 ± 1.65 <sup>c</sup>  | 18.8 ± 5.37 <sup>d</sup>  | 16.3 ± 5.05 <sup>e</sup>  | 16.0 ± 1.95 <sup>e</sup>  |
| L-Methionine            | 4.47 ± 1.45 <sup>a</sup> | 4.18 ± 2.92 <sup>a</sup>  | 4.47 ± 1.52 <sup>a</sup>  | 3.85 ± 0.69 <sup>b</sup>  | 10.1 ± 5.97 <sup>c</sup>  | 5.72 ± 2.13 <sup>d</sup>  | 6.18 ± 1.40 <sup>d</sup>  |
| L-Leucine               | 4.14 ± 0.31 <sup>a</sup> | 5.76 ± 1.62 <sup>b</sup>  | 7.88 ± 1.55 <sup>c</sup>  | 8.29 ± 1.78 <sup>d</sup>  | 13.4 ± 3.92 <sup>e</sup>  | 13.2 ± 3.82 <sup>e</sup>  | 13.6 ± 1.83 <sup>e</sup>  |
| L-Isoleucine            | 19.4 ± 2.12 <sup>a</sup> | 18.0 ± 5.96 <sup>b</sup>  | 20.2 ± 4.78 <sup>ab</sup> | 19.5 ± 3.6 <sup>a</sup>   | 45.6 ± 18.1 <sup>c</sup>  | 38.4 ± 12.7 <sup>d</sup>  | 37.5 ± 4.60 <sup>d</sup>  |
| L-Phenylalanine         | 13.7 ± 0.69 <sup>a</sup> | 18.8 ± 6.09 <sup>cb</sup> | 20.6 ± 5.89 <sup>b</sup>  | 17.2 ± 3.42 <sup>cb</sup> | 40.4 ± 19.9 <sup>d</sup>  | 29.1 ± 9.60 <sup>e</sup>  | 26.4 ± 4.26 <sup>e</sup>  |
| L-Tryptophan            | 2.99 ± 0.32 <sup>a</sup> | 3.79 ± 1.34 <sup>b</sup>  | 4.13 ± 1.20 <sup>c</sup>  | 3.56 ± 0.42 <sup>b</sup>  | 10.44 ± 5.41 <sup>d</sup> | 7.92 ± 2.44 <sup>de</sup> | 6.70 ± 1.12 <sup>e</sup>  |
| TEFAAs                  | 80.6 ± 10.3 <sup>a</sup> | 90.9 ± 32.3 <sup>b</sup>  | 110 ± 24.7 <sup>c</sup>   | 109 ± 19.3 <sup>c</sup>   | 212 ± 84.3 <sup>d</sup>   | 170 ± 54.7 <sup>e</sup>   | 165 ± 21.3 <sup>e</sup>   |
| Hydroxy-L-Proline       | 0.07 ± 0.00 <sup>a</sup> | 0.36 ± 0.02 <sup>b</sup>  | 0.54 ± 0.04 <sup>c</sup>  | 0.60 ± 0.07 <sup>c</sup>  | 0.25 ± 0.02 <sup>d</sup>  | 0.41 ± 0.01 <sup>e</sup>  | 0.56 ± 0.03 <sup>f</sup>  |
| L-Carnosine             | n.d                      | n.d                       | n.d                       | n.d                       | n.d                       | n.d                       | n.d                       |
| L-Arginine              | 1.69 ± 1.24 <sup>a</sup> | 5.34 ± 1.74 <sup>b</sup>  | 12.7 ± 3.80 <sup>c</sup>  | 9.96 ± 3.68 <sup>d</sup>  | 18.3 ± 7.58 <sup>e</sup>  | 10.4 ± 4.78 <sup>d</sup>  | 12.9 ± 1.30 <sup>c</sup>  |
| Ethanolamine            | 1.95 ± 0.21 <sup>a</sup> | 3.02 ± 0.67 <sup>b</sup>  | 3.71 ± 0.35 <sup>b</sup>  | 4.77 ± 0.31 <sup>c</sup>  | 4.67 ± 1.48 <sup>c</sup>  | 4.42 ± 1.11 <sup>e</sup>  | 4.70 ± 0.48 <sup>c</sup>  |
| L-Serine                | 5.63 ± 0.63 <sup>a</sup> | 6.19 ± 2.09 <sup>b</sup>  | 6.49 ± 1.82 <sup>b</sup>  | 7.59 ± 1.65 <sup>c</sup>  | 15.3 ± 5.76 <sup>d</sup>  | 14.8 ± 4.33 <sup>d</sup>  | 10.5 ± 1.28 <sup>e</sup>  |
| Glycine                 | 1.28 ± 0.14 <sup>a</sup> | 1.89 ± 0.36 <sup>b</sup>  | 1.98 ± 0.46 <sup>b</sup>  | 2.32 ± 0.28 <sup>c</sup>  | 5.78 ± 2.82 <sup>d</sup>  | 7.08 ± 3.69 <sup>e</sup>  | 4.59 ± 0.62 <sup>d</sup>  |
| Sarcosine               | 0.01 ± 0.00 <sup>a</sup> | 0.01 ± 0.00 <sup>a</sup>  | 0.01 ± 0.00 <sup>a</sup>  | 0.01 ± 0.00 <sup>a</sup>  | 0.01 ± 0.00 <sup>a</sup>  | 0.01 ± 0.00 <sup>a</sup>  | 0.01 ± 0.01 <sup>a</sup>  |
| L-Aspartic acid         | 1.21 ± 0.21 <sup>a</sup> | 20.5 ± 3.95 <sup>b</sup>  | 40.7 ± 3.42 <sup>c</sup>  | 49.5 ± 3.51 <sup>d</sup>  | 34.5 ± 13.8 <sup>e</sup>  | 43.4 ± 13.4 <sup>c</sup>  | 52.8 ± 5.02 <sup>d</sup>  |
| Taurine                 | 1.76 ± 0.11 <sup>a</sup> | 1.39 ± 0.01 <sup>b</sup>  | 1.11 ± 0.09 <sup>c</sup>  | 1.20 ± 0.13 <sup>c</sup>  | 1.57 ± 0.10 <sup>d</sup>  | 1.48 ± 0.08 <sup>d</sup>  | 1.31 ± 0.06 <sup>b</sup>  |
| β-Alanine               | 0.10 ± 0.01 <sup>a</sup> | 1.18 ± 0.03 <sup>b</sup>  | 1.94 ± 0.08 <sup>c</sup>  | 1.35 ± 0.17 <sup>d</sup>  | 0.54 ± 0.02 <sup>c</sup>  | 0.95 ± 0.09 <sup>b</sup>  | 1.25 ± 0.07 <sup>bd</sup> |

|                         |                          |                          |                          |                           |                           |                           |                           |
|-------------------------|--------------------------|--------------------------|--------------------------|---------------------------|---------------------------|---------------------------|---------------------------|
| L-Glutamic acid         | 4.77 ± 0.27 <sup>a</sup> | 180 ± 39.0 <sup>b</sup>  | 370 ± 19.8 <sup>c</sup>  | 557 ± 45.2 <sup>d</sup>   | 376 ± 152 <sup>c</sup>    | 462 ± 139 <sup>e</sup>    | 572 ± 62.1 <sup>d</sup>   |
| L-Citrulline            | 0.26 ± 0.02 <sup>a</sup> | 0.32 ± 0.08 <sup>b</sup> | 0.39 ± 0.06 <sup>b</sup> | 0.54 ± 0.16 <sup>c</sup>  | 0.33 ± 0.02 <sup>b</sup>  | 0.49 ± 0.05 <sup>bc</sup> | 0.42 ± 0.16 <sup>bc</sup> |
| L-Alanine               | 5.18 ± 0.60 <sup>a</sup> | 5.87 ± 1.47 <sup>b</sup> | 8.91 ± 1.88 <sup>c</sup> | 11.8 ± 1.68 <sup>d</sup>  | 13.0 ± 6.13 <sup>de</sup> | 14.1 ± 3.93 <sup>e</sup>  | 14.8 ± 1.31 <sup>e</sup>  |
| γ-Aminobutyric acid     | 0.16 ± 0.02 <sup>a</sup> | 31.0 ± 6.41 <sup>b</sup> | 59.1 ± 6.92 <sup>c</sup> | 62.3 ± 2.20 <sup>d</sup>  | 38.2 ± 13.7 <sup>b</sup>  | 49.8 ± 14.2 <sup>c</sup>  | 60.5 ± 5.75 <sup>d</sup>  |
| L-Proline               | 3.23 ± 0.14 <sup>a</sup> | 9.50 ± 2.39 <sup>b</sup> | 16.7 ± 3.10 <sup>c</sup> | 20.0 ± 2.67 <sup>d</sup>  | 16.6 ± 5.30 <sup>c</sup>  | 19.6 ± 4.16 <sup>d</sup>  | 22.6 ± 3.14 <sup>d</sup>  |
| β-Amino-isobutyric acid | 0.02 ± 0.00 <sup>a</sup> | 0.06 ± 0.01 <sup>b</sup> | 0.08 ± 0.03 <sup>c</sup> | 0.08 ± 0.01 <sup>c</sup>  | 0.04 ± 0.02 <sup>d</sup>  | 0.06 ± 0.03 <sup>b</sup>  | 0.05 ± 0.01 <sup>b</sup>  |
| α-Aminobutyric acid     | 0.12 ± 0.00 <sup>a</sup> | 0.17 ± 0.02 <sup>b</sup> | 0.24 ± 0.01 <sup>c</sup> | 0.29 ± 0.02 <sup>d</sup>  | 0.24 ± 0.03 <sup>c</sup>  | 0.25 ± 0.03 <sup>cd</sup> | 0.28 ± 0.01 <sup>d</sup>  |
| δ-Hydroxylysine         | 0.02 ± 0.00 <sup>a</sup> | 0.42 ± 0.08 <sup>b</sup> | 1.04 ± 0.16 <sup>c</sup> | 1.22 ± 0.11 <sup>d</sup>  | 0.18 ± 0.01 <sup>c</sup>  | 0.81 ± 0.08 <sup>f</sup>  | 0.80 ± 0.02 <sup>f</sup>  |
| L-Ornithine             | 0.34 ± 0.01 <sup>a</sup> | 1.69 ± 0.10 <sup>b</sup> | 2.68 ± 0.12 <sup>c</sup> | 2.08 ± 0.18 <sup>d</sup>  | 0.97 ± 0.04 <sup>c</sup>  | 1.53 ± 0.16 <sup>b</sup>  | 1.96 ± 0.08 <sup>d</sup>  |
| Cystathionine           | 0.17 ± 0.01 <sup>a</sup> | 0.10 ± 0.01 <sup>b</sup> | 0.08 ± 0.02 <sup>c</sup> | 0.13 ± 0.03 <sup>b</sup>  | 0.06 ± 0.01 <sup>d</sup>  | 0.08 ± 0.01 <sup>c</sup>  | 0.06 ± 0.02 <sup>d</sup>  |
| L-Cystine               | 0.19 ± 0.04 <sup>a</sup> | 0.14 ± 0.10 <sup>b</sup> | 0.14 ± 0.07 <sup>b</sup> | 0.28 ± 0.02 <sup>c</sup>  | 0.22 ± 0.02 <sup>d</sup>  | 0.22 ± 0.03 <sup>d</sup>  | 0.22 ± 0.04 <sup>d</sup>  |
| L-Anserine              | 0.22 ± 0.10 <sup>a</sup> | 0.14 ± 0.10 <sup>b</sup> | 0.10 ± 0.11 <sup>b</sup> | 0.22 ± 0.08 <sup>a</sup>  | 0.13 ± 0.04 <sup>b</sup>  | 0.22 ± 0.09 <sup>a</sup>  | 0.16 ± 0.09 <sup>b</sup>  |
| L-Tyrosine              | 7.43 ± 0.08 <sup>a</sup> | 8.87 ± 2.97 <sup>a</sup> | 11.1 ± 3.68 <sup>b</sup> | 9.82 ± 2.39 <sup>ab</sup> | 22.8 ± 11.7 <sup>c</sup>  | 19.2 ± 5.72 <sup>cd</sup> | 18.1 ± 3.06 <sup>d</sup>  |
| L-Homocystine           | 0.09 ± 0.06 <sup>a</sup> | 0.24 ± 0.06 <sup>b</sup> | 0.35 ± 0.11 <sup>c</sup> | 0.36 ± 0.10 <sup>c</sup>  | 0.35 ± 0.05 <sup>c</sup>  | 0.39 ± 0.10 <sup>d</sup>  | 0.30 ± 0.06 <sup>bc</sup> |
| <i>TNEFAAs</i>          | 35.9 ± 3.9 <sup>a</sup>  | 278 ± 61.7 <sup>b</sup>  | 543 ± 41.4 <sup>c</sup>  | 741 ± 69.3 <sup>d</sup>   | 549 ± 221 <sup>c</sup>    | 652 ± 195 <sup>e</sup>    | 781 ± 84.7 <sup>d</sup>   |
| <i>TFAAs</i>            | 117 ± 14.2 <sup>a</sup>  | 369 ± 94.0 <sup>b</sup>  | 653 ± 66.1 <sup>c</sup>  | 849 ± 88.6 <sup>d</sup>   | 762 ± 305 <sup>e</sup>    | 822 ± 250 <sup>d</sup>    | 945 ± 106 <sup>f</sup>    |

\* n.d.: not detected. Data are expressed as Mean ± SD (n = 3). Different alphabet superscripts indicate statistical difference ( $p < 0.05$ ) across each row. POS5, POS10, and POS15: 5, 10, and 15% tamarillo powder was added post-fermentation, respectively. PRE5, PRE10, and PRE15: 5, 10, and 15% tamarillo powder was added to milk and starter culture prior to fermentation, respectively. TEFAAs: total essential free amino acids, TNEFAAs: total non-essential free amino acids, TFAAs: total free amino acids.

Table S2B. Concentrations (mg/100g yoghurt) of free amino acids in control and tamarillo fortified yoghurts after each step of in vitro digestion  
(Cont.)

| Free amino acids/phases | After Gastric phase      |                          |                           |                           |                           |                           |                           |
|-------------------------|--------------------------|--------------------------|---------------------------|---------------------------|---------------------------|---------------------------|---------------------------|
|                         | Control                  | POS5                     | POS10                     | POS15                     | PRE5                      | PRE10                     | PRE15                     |
| L-Histidine             | 4.35 ± 1.53 <sup>a</sup> | 11.8 ± 5.17 <sup>b</sup> | 11.3 ± 3.35 <sup>b</sup>  | 17.5 ± 3.22 <sup>c</sup>  | 11.6 ± 3.07 <sup>b</sup>  | 13.7 ± 0.47 <sup>d</sup>  | 16.9 ± 4.82 <sup>c</sup>  |
| L-Threonine             | 13.1 ± 1.01 <sup>a</sup> | 17.2 ± 2.97 <sup>b</sup> | 13.4 ± 3.46 <sup>a</sup>  | 14.1 ± 1.96 <sup>a</sup>  | 19.6 ± 1.35 <sup>c</sup>  | 18.4 ± 1.82 <sup>bc</sup> | 19.7 ± 3.16 <sup>c</sup>  |
| L-Lysine                | 16.1 ± 1.60 <sup>a</sup> | 21.6 ± 5.29 <sup>b</sup> | 18.3 ± 3.54 <sup>ab</sup> | 22.0 ± 3.12 <sup>b</sup>  | 27.5 ± 2.40 <sup>c</sup>  | 29.2 ± 1.20 <sup>c</sup>  | 35.1 ± 4.43 <sup>d</sup>  |
| L-Valine                | 16.5 ± 1.13 <sup>a</sup> | 22.3 ± 4.26 <sup>b</sup> | 17.5 ± 5.34 <sup>a</sup>  | 17.7 ± 2.12 <sup>a</sup>  | 28.4 ± 1.98 <sup>c</sup>  | 27.6 ± 1.97 <sup>c</sup>  | 30.5 ± 5.01 <sup>d</sup>  |
| L-Methionine            | 8.56 ± 3.45 <sup>a</sup> | 11.9 ± 2.53 <sup>b</sup> | 9.53 ± 5.93 <sup>ab</sup> | 8.27 ± 0.34 <sup>a</sup>  | 11.0 ± 2.47 <sup>b</sup>  | 12.9 ± 2.81 <sup>c</sup>  | 11.2 ± 5.22 <sup>b</sup>  |
| L-Leucine               | 11.2 ± 0.77 <sup>a</sup> | 15.0 ± 2.78 <sup>b</sup> | 12.2 ± 2.55 <sup>ab</sup> | 12.9 ± 1.29 <sup>ab</sup> | 18.5 ± 0.70 <sup>c</sup>  | 19.6 ± 1.74 <sup>c</sup>  | 22.1 ± 2.51 <sup>d</sup>  |
| L-Isoleucine            | 58.2 ± 2.92 <sup>a</sup> | 72.6 ± 11.7 <sup>b</sup> | 56.3 ± 15.8 <sup>a</sup>  | 54.6 ± 4.69 <sup>a</sup>  | 84.0 ± 6.68 <sup>cd</sup> | 80.5 ± 5.75 <sup>c</sup>  | 88.7 ± 16.7 <sup>d</sup>  |
| L-Phenylalanine         | 51.4 ± 5.86 <sup>a</sup> | 66.6 ± 13.6 <sup>b</sup> | 51.2 ± 11.0 <sup>a</sup>  | 48.7 ± 4.18 <sup>c</sup>  | 69.0 ± 3.45 <sup>c</sup>  | 62.5 ± 5.53 <sup>b</sup>  | 63.5 ± 13.1 <sup>b</sup>  |
| L-Tryptophan            | 15.3 ± 1.79 <sup>a</sup> | 18.8 ± 3.83 <sup>b</sup> | 13.4 ± 4.93 <sup>c</sup>  | 12.3 ± 1.09 <sup>c</sup>  | 19.4 ± 0.57 <sup>b</sup>  | 16.8 ± 1.27 <sup>a</sup>  | 16.4 ± 4.07 <sup>a</sup>  |
| <i>TEFAAs</i>           | 195 ± 20.1 <sup>a</sup>  | 258 ± 52.1 <sup>b</sup>  | 203 ± 55.9 <sup>c</sup>   | 208 ± 22.0 <sup>c</sup>   | 289 ± 22.7 <sup>d</sup>   | 281 ± 22.6 <sup>d</sup>   | 304 ± 59.0 <sup>e</sup>   |
| Hydroxy-L-Proline       | 0.33 ± 0.03 <sup>a</sup> | 0.59 ± 0.05 <sup>b</sup> | 1.03 ± 0.21 <sup>c</sup>  | 0.89 ± 0.11 <sup>d</sup>  | 0.51 ± 0.08 <sup>b</sup>  | 0.85 ± 0.10 <sup>d</sup>  | 0.98 ± 0.24 <sup>cd</sup> |
| L-Carnosine             | n.d.                     | n.d.                     | n.d.                      | n.d.                      | n.d.                      | n.d.                      | n.d.                      |
| L-Arginine              | 12.6 ± 7.75 <sup>a</sup> | 3.91 ± 1.37 <sup>b</sup> | 2.55 ± 1.63 <sup>c</sup>  | 6.19 ± 1.35 <sup>d</sup>  | 6.07 ± 2.72 <sup>d</sup>  | 8.91 ± 1.24 <sup>e</sup>  | 13.9 ± 7.89 <sup>a</sup>  |
| Ethanolamine            | 2.90 ± 0.06 <sup>a</sup> | 4.34 ± 0.84 <sup>b</sup> | 4.29 ± 0.55 <sup>b</sup>  | 6.07 ± 0.57 <sup>c</sup>  | 4.90 ± 0.34 <sup>b</sup>  | 5.63 ± 0.60 <sup>bc</sup> | 6.55 ± 0.65 <sup>d</sup>  |
| L-Serine                | 14.7 ± 2.69 <sup>a</sup> | 20.7 ± 4.48 <sup>b</sup> | 16.8 ± 4.41 <sup>c</sup>  | 16.7 ± 3.25 <sup>c</sup>  | 21.3 ± 1.81 <sup>b</sup>  | 22.7 ± 1.50 <sup>d</sup>  | 23.9 ± 2.58 <sup>d</sup>  |
| Glycine                 | 13.3 ± 0.88 <sup>a</sup> | 15.8 ± 2.36 <sup>b</sup> | 12.9 ± 3.35 <sup>a</sup>  | 12.6 ± 1.22 <sup>a</sup>  | 17.2 ± 0.28 <sup>c</sup>  | 17.1 ± 1.09 <sup>c</sup>  | 17.2 ± 1.77 <sup>c</sup>  |
| Sarcosine               | 0.01 ± 0.00 <sup>a</sup> | 0.04 ± 0.01 <sup>b</sup> | 0.14 ± 0.02 <sup>c</sup>  | 0.10 ± 0.08 <sup>c</sup>  | 0.12 ± 0.00 <sup>c</sup>  | 0.04 ± 0.06 <sup>b</sup>  | 0.01 ± 0.00 <sup>a</sup>  |
| L-Aspartic acid         | 25.7 ± 2.38 <sup>a</sup> | 58.7 ± 10.1 <sup>b</sup> | 61.9 ± 14.3 <sup>b</sup>  | 73.7 ± 8.51 <sup>c</sup>  | 56.9 ± 4.00 <sup>b</sup>  | 70.1 ± 4.95 <sup>c</sup>  | 91.4 ± 13.8 <sup>d</sup>  |
| Taurine                 | 10.0 ± 0.76 <sup>a</sup> | 8.26 ± 0.62 <sup>b</sup> | 9.04 ± 1.10 <sup>c</sup>  | 9.16 ± 0.52 <sup>ac</sup> | 9.37 ± 0.57 <sup>ac</sup> | 9.75 ± 1.03 <sup>a</sup>  | 9.49 ± 1.21 <sup>ac</sup> |

|                         |                          |                          |                          |                           |                          |                          |                           |
|-------------------------|--------------------------|--------------------------|--------------------------|---------------------------|--------------------------|--------------------------|---------------------------|
| β-Alanine               | 0.29 ± 0.03 <sup>a</sup> | 1.22 ± 0.03 <sup>b</sup> | 2.38 ± 0.15 <sup>c</sup> | 1.64 ± 0.04 <sup>b</sup>  | 0.74 ± 0.07 <sup>d</sup> | 1.27 ± 0.10 <sup>b</sup> | 1.67 ± 0.17 <sup>b</sup>  |
| L-Glutamic acid         | 45.7 ± 2.11 <sup>a</sup> | 300 ± 41.4 <sup>b</sup>  | 410 ± 128 <sup>c</sup>   | 650 ± 64.1 <sup>d</sup>   | 372 ± 33.6 <sup>c</sup>  | 552 ± 41.0 <sup>e</sup>  | 771 ± 98.9 <sup>f</sup>   |
| L-Citrulline            | 0.79 ± 0.11 <sup>a</sup> | 0.68 ± 0.09 <sup>b</sup> | 0.89 ± 0.16 <sup>c</sup> | 0.98 ± 0.03 <sup>d</sup>  | 0.88 ± 0.05 <sup>c</sup> | 1.05 ± 0.08 <sup>d</sup> | 0.70 ± 0.55 <sup>b</sup>  |
| L-Alanine               | 20.1 ± 2.09 <sup>a</sup> | 27.8 ± 4.34 <sup>b</sup> | 23.4 ± 6.70 <sup>c</sup> | 26.7 ± 3.23 <sup>bc</sup> | 30.0 ± 1.07 <sup>b</sup> | 30.5 ± 1.65 <sup>b</sup> | 35.6 ± 4.62 <sup>d</sup>  |
| γ-Aminobutyric acid     | 0.56 ± 0.13 <sup>a</sup> | 42.3 ± 4.78 <sup>b</sup> | 60.4 ± 11.5 <sup>c</sup> | 62.5 ± 9.30 <sup>c</sup>  | 31.1 ± 3.01 <sup>d</sup> | 52.7 ± 1.81 <sup>e</sup> | 74.5 ± 11.3 <sup>f</sup>  |
| L-Proline               | 6.82 ± 0.18 <sup>a</sup> | 13.2 ± 1.99 <sup>b</sup> | 14.4 ± 4.77 <sup>b</sup> | 19.1 ± 1.45 <sup>c</sup>  | 14.9 ± 1.35 <sup>b</sup> | 20.9 ± 1.61 <sup>c</sup> | 26.2 ± 3.84 <sup>d</sup>  |
| β-Amino-isobutyric acid | 0.05 ± 0.01 <sup>a</sup> | 0.08 ± 0.02 <sup>b</sup> | 0.10 ± 0.02 <sup>c</sup> | 0.08 ± 0.02 <sup>b</sup>  | 0.11 ± 0.02 <sup>c</sup> | 0.16 ± 0.02 <sup>d</sup> | 0.11 ± 0.03 <sup>c</sup>  |
| α-Aminobutyric acid     | 0.13 ± 0.02 <sup>a</sup> | 0.16 ± 0.01 <sup>b</sup> | 0.27 ± 0.02 <sup>c</sup> | 0.19 ± 0.05 <sup>b</sup>  | 0.21 ± 0.01 <sup>b</sup> | 0.29 ± 0.01 <sup>c</sup> | 0.19 ± 0.15 <sup>b</sup>  |
| δ-Hydroxylysine         | 0.03 ± 0.01 <sup>a</sup> | 0.05 ± 0.02 <sup>b</sup> | 0.07 ± 0.02 <sup>c</sup> | 0.08 ± 0.04 <sup>c</sup>  | 0.05 ± 0.01 <sup>b</sup> | 0.06 ± 0.00 <sup>b</sup> | 0.08 ± 0.00 <sup>c</sup>  |
| L-Ornithine             | 3.51 ± 0.26 <sup>a</sup> | 4.51 ± 0.18 <sup>b</sup> | 6.25 ± 0.25 <sup>c</sup> | 5.64 ± 0.26 <sup>d</sup>  | 4.60 ± 0.09 <sup>b</sup> | 4.88 ± 0.35 <sup>b</sup> | 5.44 ± 0.28 <sup>d</sup>  |
| Cystathionine           | 0.28 ± 0.06 <sup>a</sup> | 0.22 ± 0.04 <sup>b</sup> | 0.23 ± 0.02 <sup>b</sup> | 0.22 ± 0.07 <sup>b</sup>  | 0.22 ± 0.05 <sup>b</sup> | 0.22 ± 0.04 <sup>b</sup> | 0.30 ± 0.02 <sup>a</sup>  |
| L-Cystine               | 7.71 ± 0.60 <sup>a</sup> | 6.67 ± 0.54 <sup>b</sup> | 7.69 ± 0.57 <sup>a</sup> | 7.64 ± 0.13 <sup>a</sup>  | 7.39 ± 0.14 <sup>c</sup> | 7.20 ± 0.35 <sup>c</sup> | 7.53 ± 0.42 <sup>a</sup>  |
| L-Anserine              | 6.82 ± 0.29 <sup>a</sup> | 6.17 ± 0.25 <sup>b</sup> | 8.04 ± 0.57 <sup>c</sup> | 7.29 ± 0.74 <sup>d</sup>  | 7.29 ± 0.41 <sup>d</sup> | 6.59 ± 0.97 <sup>a</sup> | 7.00 ± 0.71 <sup>c</sup>  |
| L-Tyrosine              | 29.8 ± 2.70 <sup>a</sup> | 39.1 ± 8.29 <sup>b</sup> | 30.4 ± 9.95 <sup>a</sup> | 27.5 ± 2.61 <sup>c</sup>  | 41.3 ± 1.92 <sup>d</sup> | 38.6 ± 3.04 <sup>b</sup> | 39.5 ± 8.11 <sup>bd</sup> |
| L-Homocystine           | 0.28 ± 0.07 <sup>a</sup> | 0.23 ± 0.04 <sup>b</sup> | 0.23 ± 0.02 <sup>b</sup> | 0.30 ± 0.07 <sup>a</sup>  | 0.29 ± 0.07 <sup>a</sup> | 0.36 ± 0.11 <sup>c</sup> | 0.26 ± 0.07 <sup>ab</sup> |
| <i>TNEFAAs</i>          | 202 ± 23.2 <sup>a</sup>  | 555 ± 83.6 <sup>b</sup>  | 673 ± 188 <sup>c</sup>   | 935 ± 97.8 <sup>d</sup>   | 627 ± 51.7 <sup>c</sup>  | 852 ± 61.8 <sup>d</sup>  | 1133 ± 157 <sup>e</sup>   |
| <i>TFAAs</i>            | 397 ± 43.3 <sup>a</sup>  | 813 ± 136 <sup>b</sup>   | 876 ± 244 <sup>b</sup>   | 1143 ± 120 <sup>c</sup>   | 916 ± 74.4 <sup>d</sup>  | 1134 ± 84.3 <sup>c</sup> | 1437 ± 216 <sup>e</sup>   |

\* n.d: not detected. Data are expressed as Mean ± SD (n = 3). Different alphabets superscripts indicate statistical difference ( $p < 0.05$ ) across each row. POS5, POS10, and POS15: 5, 10, and 15% tamarillo powder was added post-fermentation, respectively. PRE5, PRE10, and PRE15: 5, 10, and 15% tamarillo powder was added to milk and starter culture prior to fermentation, respectively. TEFAAs: total essential free amino acids, TNEFAAs: total non-essential free amino acids, TFAAs: total free amino acids.

Table S2B. Concentrations (mg/100g yoghurt) of free amino acids in control and tamarillo fortified yoghurts after each step of *in vitro* digestion

(Cont.)

| Free amino acids/phases | After Intestinal phase    |                           |                          |                           |                          |                           |                           |
|-------------------------|---------------------------|---------------------------|--------------------------|---------------------------|--------------------------|---------------------------|---------------------------|
|                         | Control                   | POS5                      | POS10                    | POS15                     | PRE5                     | PRE10                     | PRE15                     |
| L-Histidine             | 29.3 ± 7.75 <sup>a</sup>  | 30.1 ± 6.95 <sup>a</sup>  | 28.8 ± 10.7 <sup>a</sup> | 37.1 ± 12.41 <sup>b</sup> | 44.3 ± 12.7 <sup>c</sup> | 38.5 ± 6.98 <sup>b</sup>  | 42.9 ± 6.72 <sup>c</sup>  |
| L-Threonine             | 32.4 ± 6.11 <sup>ab</sup> | 34.8 ± 1.49 <sup>a</sup>  | 29.6 ± 5.37 <sup>b</sup> | 32.0 ± 3.87 <sup>ab</sup> | 52.6 ± 13.8 <sup>c</sup> | 43.0 ± 6.95 <sup>d</sup>  | 43.8 ± 6.34 <sup>d</sup>  |
| L-Lysine                | 177 ± 27.7 <sup>a</sup>   | 194 ± 10.1 <sup>b</sup>   | 164 ± 13.2 <sup>a</sup>  | 179 ± 18.8 <sup>a</sup>   | 236 ± 30.3 <sup>cd</sup> | 229 ± 40.6 <sup>c</sup>   | 241 ± 40.9 <sup>d</sup>   |
| L-Valine                | 51.6 ± 11.0 <sup>ab</sup> | 55.5 ± 1.44 <sup>a</sup>  | 46.2 ± 8.32 <sup>b</sup> | 48.2 ± 4.53 <sup>b</sup>  | 80.6 ± 17.8 <sup>c</sup> | 69.9 ± 12.0 <sup>d</sup>  | 70.9 ± 9.61 <sup>d</sup>  |
| L-Methionine            | 13.7 ± 5.40 <sup>a</sup>  | 13.0 ± 1.18 <sup>a</sup>  | 10.4 ± 1.85 <sup>b</sup> | 17.4 ± 3.81 <sup>c</sup>  | 31.2 ± 19.1 <sup>d</sup> | 12.2 ± 2.26 <sup>a</sup>  | 13.7 ± 4.36 <sup>a</sup>  |
| L-Leucine               | 43.0 ± 8.13 <sup>a</sup>  | 45.6 ± 2.62 <sup>a</sup>  | 37.9 ± 6.34 <sup>b</sup> | 40.8 ± 3.98 <sup>ab</sup> | 61.8 ± 14.2 <sup>c</sup> | 54.7 ± 8.86 <sup>d</sup>  | 57.0 ± 7.22 <sup>cd</sup> |
| L-Isoleucine            | 191 ± 34.7 <sup>a</sup>   | 200 ± 12.1 <sup>a</sup>   | 163 ± 21.2 <sup>b</sup>  | 169 ± 20.2 <sup>b</sup>   | 251 ± 36.0 <sup>c</sup>  | 221 ± 33.4 <sup>ac</sup>  | 227 ± 31.0 <sup>ac</sup>  |
| L-Phenylalanine         | 133 ± 19.1 <sup>a</sup>   | 148 ± 4.58 <sup>b</sup>   | 126 ± 16.6 <sup>a</sup>  | 125 ± 13.6 <sup>a</sup>   | 179 ± 29.3 <sup>c</sup>  | 162 ± 25.4 <sup>c</sup>   | 157 ± 16.3 <sup>b</sup>   |
| L-Tryptophan            | 51.0 ± 8.74 <sup>ab</sup> | 55.5 ± 3.22 <sup>a</sup>  | 45.2 ± 8.14 <sup>b</sup> | 43.8 ± 6.51 <sup>b</sup>  | 73.0 ± 17.3 <sup>c</sup> | 55.7 ± 9.70 <sup>a</sup>  | 53.1 ± 5.44 <sup>a</sup>  |
| <i>TEFAAs</i>           | 722 ± 129 <sup>a</sup>    | 778 ± 43.6 <sup>b</sup>   | 651 ± 91.6 <sup>c</sup>  | 691 ± 87.7 <sup>ac</sup>  | 1009 ± 190 <sup>d</sup>  | 886 ± 146 <sup>e</sup>    | 905 ± 128 <sup>de</sup>   |
| Hydroxy-L-Proline       | 0.50 ± 0.04 <sup>a</sup>  | 0.91 ± 0.05 <sup>b</sup>  | 1.60 ± 0.21 <sup>c</sup> | 1.10 ± 0.08 <sup>d</sup>  | 0.70 ± 0.05 <sup>e</sup> | 1.15 ± 0.03 <sup>d</sup>  | 1.25 ± 0.17 <sup>f</sup>  |
| L-Carnosine             | n.d.                      | n.d.                      | n.d.                     | n.d.                      | n.d.                     | n.d.                      | n.d.                      |
| L-Arginine              | 109 ± 44.3 <sup>a</sup>   | 101 ± 27.3 <sup>a</sup>   | 81.7 ± 20.4 <sup>b</sup> | 91.3 ± 25.3 <sup>ab</sup> | 168 ± 37.8 <sup>c</sup>  | 155 ± 29.8 <sup>c</sup>   | 111 ± 25.1 <sup>a</sup>   |
| Ethanolamine            | 5.94 ± 0.33 <sup>a</sup>  | 6.93 ± 0.31 <sup>b</sup>  | 7.11 ± 0.48 <sup>b</sup> | 8.98 ± 0.06 <sup>c</sup>  | 8.21 ± 0.74 <sup>c</sup> | 9.76 ± 1.21 <sup>d</sup>  | 10.0 ± 0.32 <sup>d</sup>  |
| L-Serine                | 31.5 ± 7.18 <sup>a</sup>  | 32.9 ± 3.75 <sup>a</sup>  | 26.6 ± 4.76 <sup>b</sup> | 28.6 ± 2.75 <sup>b</sup>  | 63.1 ± 19.9 <sup>c</sup> | 47.1 ± 8.85 <sup>d</sup>  | 42.8 ± 5.83 <sup>d</sup>  |
| Glycine                 | 74.9 ± 10.5 <sup>a</sup>  | 81.0 ± 1.32 <sup>b</sup>  | 69.6 ± 8.21 <sup>c</sup> | 69.8 ± 7.71 <sup>c</sup>  | 101 ± 17.04 <sup>d</sup> | 90.4 ± 15.3 <sup>e</sup>  | 86.0 ± 8.64 <sup>be</sup> |
| Sarcosine               | 0.08 ± 0.06 <sup>a</sup>  | 0.11 ± 0.08 <sup>ab</sup> | 0.07 ± 0.01 <sup>a</sup> | 0.13 ± 0.04 <sup>b</sup>  | 0.13 ± 0.01 <sup>b</sup> | 0.15 ± 0.02 <sup>c</sup>  | 0.10 ± 0.07 <sup>ab</sup> |
| L-Aspartic acid         | 34.0 ± 6.57 <sup>a</sup>  | 59.8 ± 1.90 <sup>b</sup>  | 68.5 ± 7.15 <sup>c</sup> | 93.3 ± 9.95 <sup>d</sup>  | 78.6 ± 16.0 <sup>e</sup> | 97.8 ± 18.7 <sup>d</sup>  | 117 ± 19.3 <sup>f</sup>   |
| Taurine                 | 23.1 ± 0.23 <sup>a</sup>  | 23.6 ± 0.64 <sup>a</sup>  | 27.9 ± 3.77 <sup>b</sup> | 21.8 ± 1.38 <sup>c</sup>  | 22.1 ± 1.49 <sup>c</sup> | 25.2 ± 0.76 <sup>ab</sup> | 22.8 ± 1.57 <sup>ac</sup> |



|                         |                               |                                |                               |                               |                               |                               |                               |
|-------------------------|-------------------------------|--------------------------------|-------------------------------|-------------------------------|-------------------------------|-------------------------------|-------------------------------|
| β-Alanine               | 0.82 ± 0.02 <sup>a</sup>      | 1.91 ± 0.09 <sup>b</sup>       | 2.09 ± 0.17 <sup>c</sup>      | 3.62 ± 0.35 <sup>d</sup>      | 1.26 ± 0.05 <sup>c</sup>      | 1.96 ± 0.12 <sup>b</sup>      | 2.26 ± 0.19 <sup>c</sup>      |
| L-Glutamic acid         | 75.3 ± 13.3 <sup>a</sup>      | 310 ± 11.1 <sup>b</sup>        | 452 ± 33.6 <sup>c</sup>       | 806 ± 91.03 <sup>d</sup>      | 470 ± 69.1 <sup>c</sup>       | 750 ± 119 <sup>d</sup>        | 1027 ± 123 <sup>e</sup>       |
| L-Citrulline            | 0.25 ± 0.07 <sup>a</sup>      | 0.38 ± 0.17 <sup>b</sup>       | 0.47 ± 0.01 <sup>c</sup>      | 1.04 ± 0.15 <sup>d</sup>      | 0.56 ± 0.11 <sup>c</sup>      | 1.17 ± 0.07 <sup>d</sup>      | 1.30 ± 0.03 <sup>e</sup>      |
| L-Alanine               | 43.0 ± 8.16 <sup>a</sup>      | 47.9 ± 0.85 <sup>b</sup>       | 42.4 ± 6.69 <sup>a</sup>      | 47.5 ± 4.42 <sup>b</sup>      | 70.6 ± 14.9 <sup>c</sup>      | 60.6 ± 9.94 <sup>c</sup>      | 66.0 ± 9.14 <sup>c</sup>      |
| γ-Aminobutyric acid     | 0.49 ± 0.40 <sup>a</sup>      | 39.0 ± 3.19 <sup>b</sup>       | 61.6 ± 3.21 <sup>c</sup>      | 73.8 ± 8.32 <sup>d</sup>      | 34.3 ± 3.36 <sup>b</sup>      | 66.1 ± 10.17 <sup>c</sup>     | 90.6 ± 13.9 <sup>e</sup>      |
| L-Proline               | 14.4 ± 3.30 <sup>a</sup>      | 13.8 ± 0.43 <sup>a</sup>       | 20.2 ± 0.59 <sup>b</sup>      | 27.9 ± 1.21 <sup>c</sup>      | 29.4 ± 6.44 <sup>c</sup>      | 35.1 ± 5.77 <sup>d</sup>      | 40.3 ± 3.93 <sup>d</sup>      |
| β-Amino-isobutyric acid | 0.19 ± 0.02 <sup>a</sup>      | 0.18 ± 0.03 <sup>a</sup>       | 0.25 ± 0.06 <sup>b</sup>      | 0.22 ± 0.03 <sup>ab</sup>     | 0.20 ± 0.03 <sup>ab</sup>     | 0.23 ± 0.01 <sup>ab</sup>     | 0.17 ± 0.07 <sup>b</sup>      |
| α-Aminobutyric acid     | 1.08 ± 0.21 <sup>a</sup>      | 1.17 ± 0.21 <sup>a</sup>       | 1.47 ± 0.21 <sup>b</sup>      | 1.06 ± 0.24 <sup>a</sup>      | 1.26 ± 0.04 <sup>ab</sup>     | 1.26 ± 0.10 <sup>ab</sup>     | 0.99 ± 0.09 <sup>a</sup>      |
| δ-Hydroxylysine         | 0.10 ± 0.01 <sup>ab</sup>     | 0.08 ± 0.01 <sup>a</sup>       | 0.13 ± 0.04 <sup>b</sup>      | 0.13 ± 0.02 <sup>b</sup>      | 0.12 ± 0.01 <sup>b</sup>      | 0.11 ± 0.05 <sup>ab</sup>     | 0.10 ± 0.03 <sup>ab</sup>     |
| L-Ornithine             | 4.32 ± 0.13 <sup>a</sup>      | 5.53 ± 0.40 <sup>b</sup>       | 8.56 ± 0.80 <sup>c</sup>      | 5.81 ± 0.29 <sup>b</sup>      | 5.43 ± 0.28 <sup>b</sup>      | 6.32 ± 1.10 <sup>d</sup>      | 6.54 ± 0.65 <sup>d</sup>      |
| Cystathionine           | 0.77 ± 0.07 <sup>a</sup>      | 0.62 ± 0.02 <sup>b</sup>       | 0.76 ± 0.07 <sup>a</sup>      | 0.67 ± 0.05 <sup>b</sup>      | 0.83 ± 0.05 <sup>c</sup>      | 0.82 ± 0.14 <sup>c</sup>      | 0.66 ± 0.18 <sup>b</sup>      |
| L-Cystine               | 16.6 ± 0.77 <sup>a</sup>      | 16.4 ± 1.68 <sup>a</sup>       | 20.4 ± 3.92 <sup>b</sup>      | 15.0 ± 1.83 <sup>c</sup>      | 16.4 ± 0.92 <sup>a</sup>      | 17.5 ± 2.92 <sup>ab</sup>     | 15.9 ± 1.80 <sup>ac</sup>     |
| L-Anserine              | 17.2 ± 1.99 <sup>ab</sup>     | 16.0 ± 3.58 <sup>b</sup>       | 21.4 ± 4.40 <sup>c</sup>      | 15.5 ± 0.78 <sup>b</sup>      | 16.3 ± 1.37 <sup>b</sup>      | 17.8 ± 2.63 <sup>a</sup>      | 17.4 ± 1.18 <sup>a</sup>      |
| L-Tyrosine              | 146 ± 24.7 <sup>a</sup>       | 158 ± 4.09 <sup>b</sup>        | 132 ± 17.8 <sup>c</sup>       | 124 ± 12.74 <sup>c</sup>      | 193 ± 35.5 <sup>d</sup>       | 166 ± 27.9 <sup>b</sup>       | 158 ± 17.3 <sup>b</sup>       |
| L-Homocystine           | 0.06 ± 0.01 <sup>a</sup>      | 0.14 ± 0.03 <sup>b</sup>       | 0.31 ± 0.03 <sup>c</sup>      | 0.23 ± 0.04 <sup>d</sup>      | 0.11 ± 0.08 <sup>b</sup>      | 0.19 ± 0.06 <sup>b</sup>      | 0.20 ± 0.02 <sup>b</sup>      |
| <i>TNEFAAs</i>          | <i>599 ± 123<sup>a</sup></i>  | <i>918 ± 50.7<sup>b</sup></i>  | <i>1046 ± 128<sup>c</sup></i> | <i>1437 ± 169<sup>d</sup></i> | <i>1282 ± 226<sup>e</sup></i> | <i>1550 ± 255<sup>d</sup></i> | <i>1819 ± 233<sup>f</sup></i> |
| <i>TFAAs</i>            | <i>1321 ± 251<sup>a</sup></i> | <i>1695 ± 94.4<sup>b</sup></i> | <i>1697 ± 220<sup>b</sup></i> | <i>2129 ± 256<sup>c</sup></i> | <i>2290 ± 416<sup>c</sup></i> | <i>2436 ± 401<sup>d</sup></i> | <i>2724 ± 361<sup>e</sup></i> |

\* n.d: not detected. Data are expressed as Mean ± SD (n = 3). Different alphabets superscripts indicate statistical difference ( $p < 0.05$ ) across each row. POS5, POS10, and POS15: 5, 10, and 15% tamarillo powder was added post-fermentation, respectively. PRE5, PRE10, and PRE15: 5, 10, and 15% tamarillo powder was added to milk and starter culture prior to fermentation, respectively. TEFAAs: total essential free amino acids, TNEFAAs: total non-essential free amino acids, TFAAs: total free amino acids.

Table S3A. Concentrations (mg/100g yoghurt) of individual polyphenols in tamarillo fortified yoghurts after oral phase of *in vitro* digestion

| Polyphenols               | POS5                       | POS10                       | POS15                       | PRE5                        | PRE10                       | PRE15                       |
|---------------------------|----------------------------|-----------------------------|-----------------------------|-----------------------------|-----------------------------|-----------------------------|
| <i>Phenolics</i>          |                            |                             |                             |                             |                             |                             |
| Gallic Acid               | 0.009 ± 0.000 <sup>a</sup> | 0.009 ± 0.001 <sup>ab</sup> | 0.010 ± 0.000 <sup>b</sup>  | 0.009 ± 0.000 <sup>a</sup>  | 0.009 ± 0.000 <sup>a</sup>  | 0.010 ± 0.002 <sup>b</sup>  |
| Catechin                  | 0.011 ± 0.007 <sup>a</sup> | 0.163 ± 0.008 <sup>b</sup>  | 0.187 ± 0.038 <sup>c</sup>  | 0.005 ± 0.000 <sup>a</sup>  | 0.013 ± 0.004 <sup>ad</sup> | 0.019 ± 0.006 <sup>d</sup>  |
| Caffeic acid              | 0.006 ± 0.001 <sup>a</sup> | 0.014 ± 0.005 <sup>b</sup>  | 0.014 ± 0.006 <sup>b</sup>  | 0.005 ± 0.001 <sup>a</sup>  | 0.009 ± 0.003 <sup>b</sup>  | 0.028 ± 0.006 <sup>c</sup>  |
| Chlorogenic acid          | 0.712 ± 0.033 <sup>a</sup> | 0.718 ± 0.011 <sup>a</sup>  | 1.159 ± 0.059 <sup>b</sup>  | 0.568 ± 0.012 <sup>c</sup>  | 0.649 ± 0.010 <sup>d</sup>  | 1.011 ± 0.022 <sup>b</sup>  |
| Epicatechin               | 0.381 ± 0.033 <sup>a</sup> | 0.415 ± 0.072 <sup>b</sup>  | 0.453 ± 0.036 <sup>b</sup>  | 0.301 ± 0.042 <sup>c</sup>  | 0.396 ± 0.016 <sup>a</sup>  | 0.404 ± 0.046 <sup>b</sup>  |
| p-Cumaric acid            | 0.008 ± 0.001 <sup>a</sup> | 0.008 ± 0.005 <sup>ab</sup> | 0.010 ± 0.004 <sup>b</sup>  | 0.004 ± 0.001 <sup>c</sup>  | 0.006 ± 0.004 <sup>ac</sup> | 0.007 ± 0.001 <sup>ac</sup> |
| Ferulic acid              | 0.005 ± 0.002 <sup>a</sup> | 0.008 ± 0.005 <sup>ab</sup> | 0.009 ± 0.003 <sup>b</sup>  | 0.008 ± 0.004 <sup>ab</sup> | 0.012 ± 0.004 <sup>c</sup>  | 0.015 ± 0.005 <sup>c</sup>  |
| Rutin                     | 0.015 ± 0.003 <sup>a</sup> | 0.016 ± 0.006 <sup>a</sup>  | 0.018 ± 0.004 <sup>b</sup>  | 0.010 ± 0.002 <sup>c</sup>  | 0.012 ± 0.000 <sup>c</sup>  | 0.021 ± 0.003 <sup>d</sup>  |
| Ellagic Acid              | 0.016 ± 0.002 <sup>a</sup> | 0.021 ± 0.003 <sup>b</sup>  | 0.024 ± 0.004 <sup>bd</sup> | 0.014 ± 0.001 <sup>c</sup>  | 0.015 ± 0.003 <sup>ac</sup> | 0.027 ± 0.007 <sup>d</sup>  |
| Kaempferol-3-rutinoside   | 2.407 ± 0.402 <sup>a</sup> | 3.276 ± 0.234 <sup>b</sup>  | 4.561 ± 0.434 <sup>c</sup>  | 2.812 ± 0.344 <sup>a</sup>  | 3.532 ± 0.184 <sup>b</sup>  | 4.222 ± 0.146 <sup>c</sup>  |
| Isorhamnetin-3-rutinoside | 0.002 ± 0.001 <sup>a</sup> | 0.002 ± 0.000 <sup>a</sup>  | 0.002 ± 0.000 <sup>a</sup>  | 0.002 ± 0.001 <sup>b</sup>  | 0.002 ± 0.001 <sup>b</sup>  | 0.003 ± 0.000 <sup>b</sup>  |
| Kaempferol                | 0.007 ± 0.001 <sup>a</sup> | 0.007 ± 0.002 <sup>a</sup>  | 0.009 ± 0.003 <sup>b</sup>  | 0.006 ± 0.001 <sup>a</sup>  | 0.008 ± 0.001 <sup>ab</sup> | 0.010 ± 0.003 <sup>b</sup>  |
| <i>Anthocyanins</i>       |                            |                             |                             |                             |                             |                             |
| Delphinidin-3-rutinoside  | 1.785 ± 0.005 <sup>a</sup> | 1.934 ± 0.003 <sup>b</sup>  | 5.899 ± 0.002 <sup>c</sup>  | 1.892 ± 0.004 <sup>a</sup>  | 4.042 ± 0.003 <sup>d</sup>  | 4.371 ± 0.003 <sup>c</sup>  |
| Cyanidin-3-rutinoside     | 0.143 ± 0.002 <sup>a</sup> | 0.146 ± 0.023 <sup>a</sup>  | 0.147 ± 0.012 <sup>ab</sup> | 0.145 ± 0.050 <sup>a</sup>  | 0.147 ± 0.027 <sup>ab</sup> | 0.151 ± 0.033 <sup>b</sup>  |
| Pelargonidin-3-rutinoside | 0.573 ± 0.059 <sup>a</sup> | 0.962 ± 0.039 <sup>b</sup>  | 2.132 ± 0.236 <sup>c</sup>  | 0.627 ± 0.126 <sup>a</sup>  | 1.026 ± 0.041 <sup>b</sup>  | 1.902 ± 0.209 <sup>c</sup>  |

\* Data are expressed as Mean ± SD (n = 3). Different alphabets superscripts indicate statistical difference ( $p < 0.05$ ) across each row. No polyphenols were detected in the control yoghurt. POS5, POS10, and POS15: 5, 10, and 15% tamarillo powder was added post-fermentation, respectively. PRE5, PRE10, and PRE15: 5, 10, and 15% tamarillo powder was added to milk and starter culture prior to fermentation, respectively

Table S3B. Concentrations (mg/100g yoghurt) of individual polyphenols in tamarillo fortified yoghurts after gastric phase of *in vitro* digestion

| Polyphenols               | POS5                       | POS10                       | POS15                      | PRE5                        | PRE10                       | PRE15                       |
|---------------------------|----------------------------|-----------------------------|----------------------------|-----------------------------|-----------------------------|-----------------------------|
| <i>Phenolics</i>          |                            |                             |                            |                             |                             |                             |
| Gallic Acid               | 0.024 ± 0.002 <sup>a</sup> | 0.027 ± 0.002 <sup>b</sup>  | 0.028 ± 0.001 <sup>b</sup> | 0.025 ± 0.001 <sup>ab</sup> | 0.024 ± 0.000 <sup>a</sup>  | 0.025 ± 0.001 <sup>ab</sup> |
| Catechin                  | 0.008 ± 0.001 <sup>a</sup> | 0.015 ± 0.005 <sup>b</sup>  | 0.040 ± 0.010 <sup>c</sup> | 0.012 ± 0.003 <sup>b</sup>  | 0.013 ± 0.004 <sup>b</sup>  | 0.028 ± 0.010 <sup>d</sup>  |
| Caffeic acid              | 0.019 ± 0.002 <sup>a</sup> | 0.025 ± 0.004 <sup>b</sup>  | 0.031 ± 0.002 <sup>c</sup> | 0.024 ± 0.003 <sup>b</sup>  | 0.027 ± 0.003 <sup>b</sup>  | 0.034 ± 0.006 <sup>c</sup>  |
| Chlorogenic acid          | 3.043 ± 0.130 <sup>a</sup> | 3.194 ± 0.152 <sup>b</sup>  | 5.931 ± 0.291 <sup>c</sup> | 2.937 ± 0.133 <sup>a</sup>  | 3.480 ± 0.142 <sup>d</sup>  | 5.635 ± 0.218 <sup>c</sup>  |
| Epicatechin               | 0.427 ± 0.025 <sup>a</sup> | 0.500 ± 0.014 <sup>b</sup>  | 0.500 ± 0.003 <sup>b</sup> | 0.428 ± 0.024 <sup>a</sup>  | 0.508 ± 0.074 <sup>b</sup>  | 0.535 ± 0.080 <sup>c</sup>  |
| p-Cumaric acid            | 0.005 ± 0.001 <sup>a</sup> | 0.006 ± 0.002 <sup>ab</sup> | 0.007 ± 0.002 <sup>b</sup> | 0.005 ± 0.001 <sup>a</sup>  | 0.006 ± 0.002 <sup>ab</sup> | 0.006 ± 0.001 <sup>ab</sup> |
| Ferulic acid              | 0.003 ± 0.001 <sup>a</sup> | 0.004 ± 0.001 <sup>ab</sup> | 0.005 ± 0.001 <sup>b</sup> | 0.006 ± 0.001 <sup>bc</sup> | 0.008 ± 0.004 <sup>c</sup>  | 0.008 ± 0.003 <sup>c</sup>  |
| Rutin                     | 0.022 ± 0.005 <sup>a</sup> | 0.040 ± 0.010 <sup>b</sup>  | 0.046 ± 0.008 <sup>b</sup> | 0.019 ± 0.004 <sup>a</sup>  | 0.030 ± 0.005 <sup>c</sup>  | 0.040 ± 0.002 <sup>b</sup>  |
| Ellagic acid              | 0.026 ± 0.003 <sup>a</sup> | 0.029 ± 0.001 <sup>ab</sup> | 0.035 ± 0.008 <sup>b</sup> | 0.031 ± 0.007 <sup>b</sup>  | 0.037 ± 0.010 <sup>b</sup>  | 0.069 ± 0.019 <sup>c</sup>  |
| Kaempferol-3-rutinoside   | 1.560 ± 0.227 <sup>a</sup> | 3.365 ± 0.361 <sup>b</sup>  | 6.305 ± 0.488 <sup>c</sup> | 2.665 ± 0.347 <sup>d</sup>  | 4.458 ± 0.475 <sup>e</sup>  | 5.748 ± 0.261 <sup>f</sup>  |
| Isorhamnetin-3-rutinoside | 0.002 ± 0.000 <sup>a</sup> | 0.005 ± 0.002 <sup>b</sup>  | 0.007 ± 0.001 <sup>c</sup> | 0.003 ± 0.000 <sup>a</sup>  | 0.003 ± 0.001 <sup>ab</sup> | 0.003 ± 0.001 <sup>ab</sup> |
| Kaempferol                | 0.009 ± 0.001 <sup>a</sup> | 0.010 ± 0.001 <sup>ab</sup> | 0.011 ± 0.002 <sup>b</sup> | 0.011 ± 0.001 <sup>b</sup>  | 0.012 ± 0.001 <sup>c</sup>  | 0.012 ± 0.001 <sup>c</sup>  |
| <i>Anthocyanins</i>       |                            |                             |                            |                             |                             |                             |
| Delphinidin-3-rutinoside  | 1.912 ± 0.040 <sup>a</sup> | 3.312 ± 0.092 <sup>b</sup>  | 7.617 ± 0.035 <sup>c</sup> | 7.683 ± 0.058 <sup>c</sup>  | 8.861 ± 0.022 <sup>d</sup>  | 9.300 ± 0.107 <sup>e</sup>  |
| Cyanidin-3-rutinoside     | 0.352 ± 0.042 <sup>a</sup> | 0.491 ± 0.050 <sup>b</sup>  | 0.489 ± 0.042 <sup>b</sup> | 0.352 ± 0.025 <sup>a</sup>  | 0.420 ± 0.011 <sup>c</sup>  | 0.471 ± 0.055 <sup>bc</sup> |
| Pelargonidin-3-rutinoside | 1.722 ± 0.143 <sup>a</sup> | 3.200 ± 0.208 <sup>b</sup>  | 5.835 ± 0.393 <sup>c</sup> | 2.388 ± 0.170 <sup>d</sup>  | 3.720 ± 0.139 <sup>e</sup>  | 4.678 ± 0.085 <sup>f</sup>  |

\* Data are expressed as Mean ± SD (n = 3). Different alphabets superscripts indicate statistical difference ( $p < 0.05$ ) across each row. No polyphenols were detected in the control yoghurt. POS5, POS10, and POS15: 5, 10, and 15% tamarillo powder was added post-fermentation, respectively. PRE5, PRE10, and PRE15: 5, 10, and 15% tamarillo powder was added to milk and starter culture prior to fermentation, respectively
